# Supplementary material for: Impact of the environment and the topology on the performance of hierarchical body area networks
Source: Springer Nature journal article supplement (doi:10.1186/1687-1499-2011-122), 2011-10-07

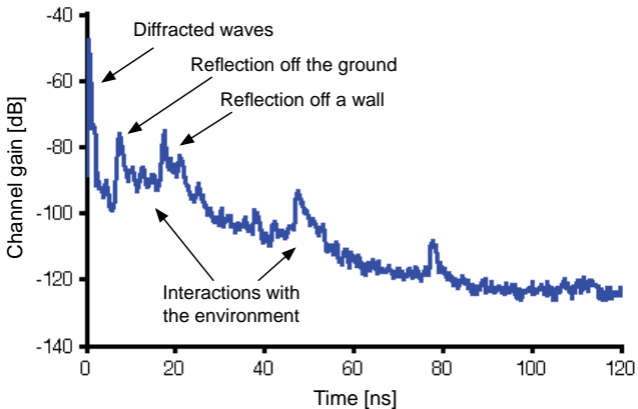

Supplement: 13638_2010_122_MOESM2_ESM.pdf [file 13638_2010_122_MOESM2_ESM.pdf]
