# Supplementary figures and images for: Impact of the environment and the topology on the performance of hierarchical body area networks
Source: Springer Nature journal article supplement (doi:10.1186/1687-1499-2011-122), 2011-10-07

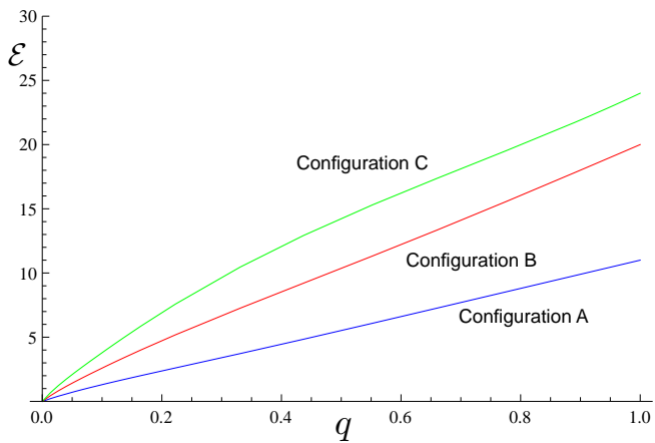

Supplement: 13638_2010_122_MOESM14_ESM.pdf [file 13638_2010_122_MOESM14_ESM.pdf]

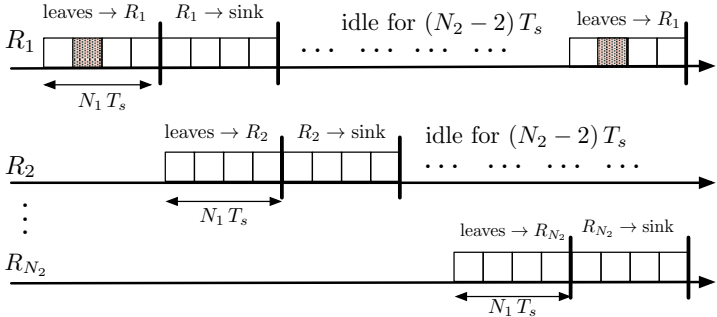

Supplement: 13638_2010_122_MOESM15_ESM.pdf [file 13638_2010_122_MOESM15_ESM.pdf]

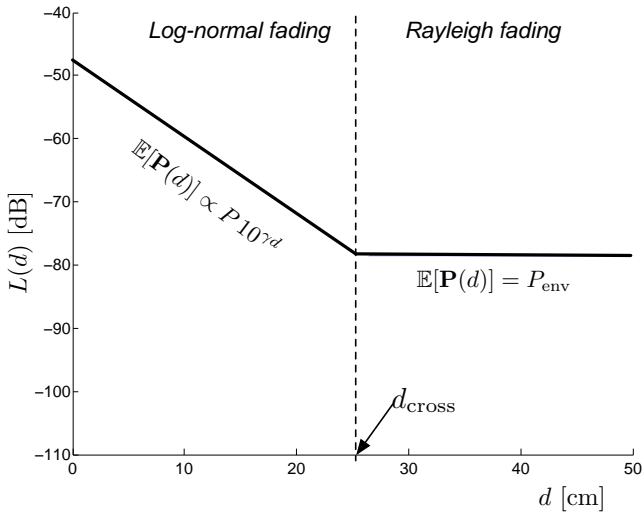

Supplement: 13638_2010_122_MOESM5_ESM.pdf [file 13638_2010_122_MOESM5_ESM.pdf]
